# Supplementary material for: A luminescent homochiral 3D Cd(ii) framework with a threefold interpenetrating uniform net 86
Source: Royal Society of Chemistry journal article supplement (doi:10.1039/b908792c), 2009-01-01
Supplement: b908792c.pdf [file b908792c.pdf]

## Supplementary Information

### **A luminescent homochiral 3D Cd(II) framework with a threefold interpenetrating uniform net $8^6\ddagger$**

**Rui Feng,<sup>ab</sup> Fei-Long Jiang,<sup>a</sup> Lian Chen,<sup>a</sup> Chun-Feng Yan,<sup>ab</sup> Ming-Yan Wu,<sup>a</sup> and  
Mao-Chun Hong<sup>\*a</sup>**

<sup>a</sup>State Key Laboratory of Structure Chemistry, Fujian Institute of Research on the  
Structure of Matter, Chinese Academy of Sciences, Fuzhou, 350002, China.

<sup>b</sup> Graduate School of the Chinese Academy of Sciences, Beijing, 100049, China.

- Corresponding author:

E-mail: *hmc@fjirsm.ac.cn*.

Tel: +86-591-83792460; Fax: +86-591-83794946

### Synthesis of the Complex 1

Hydrothermal reaction of H<sub>2</sub>dtba (115 mg, 0.375 mmol), bpp (74 mg, 0.375 mmol) and Cd(CH<sub>3</sub>CO<sub>2</sub>)<sub>2</sub>·2H<sub>2</sub>O (100 mg, 0.375 mmol) in H<sub>2</sub>O (10 ml) solution was performed in a Teflon-lined stainless steel bomb at 120 °C for 6 days, and the mixture was then cooled to room temperature at a rate of *ca.* 10 °C/h. Brown crystals were obtained (yield: 77% based on Cd(CH<sub>3</sub>CO<sub>2</sub>)<sub>2</sub>·2H<sub>2</sub>O). Anal. for C<sub>27</sub>H<sub>22</sub>Cd<sub>1</sub>N<sub>2</sub>O<sub>4</sub>S<sub>2</sub> (%): Calcd.: C, 52.73; H, 3.60; N, 4.55. Found: C, 53.51; H, 3.51; N, 4.13. IR (KBr pellet, cm<sup>-1</sup>): 3435 (s), 1614 (m), 1574 (m), 1537 (s), 1400 (vs), 859 (m), 746 (m).

### Crystallographic Analyses

The intensity data were collected on a Saturn 70 CCD diffractometer for **1**, with graphite-monochromated MoK $\alpha$  radiation ( $\lambda = 0.71073 \text{ \AA}$ ) at room temperature. All absorption corrections were performed by using the multiscan program. The structure were solved by direct methods and refined by full-matrix least squares on  $F^2$  with the SHELXTL-97 program.<sup>S1</sup>

### Thermal Gravimetric Analysis (TGA)

To examine the thermal stability of the compound **1**, the thermal gravimetric analysis (TGA) of **1** has been performed (Fig. S4). There is no significant mass loss up to 305 °C. Subsequent there follows a rapid mass loss between 305 and 420 °C, corresponding to the decomposition of **1**. This suggests that the framework of **1** possesses high thermal stability.

### X-ray Diffractometer Analysis (XRD)

The positions of diffraction peaks of the experimental are consistent with the simulated XRD patterns well, indicating the phase purity of the as-synthesized simple (Fig. S5).

(S1) Sheldrick, G. M. SHELXTL-97, Program for the Solution of Crystal Structures; University of Göttingen: Germany 1997.

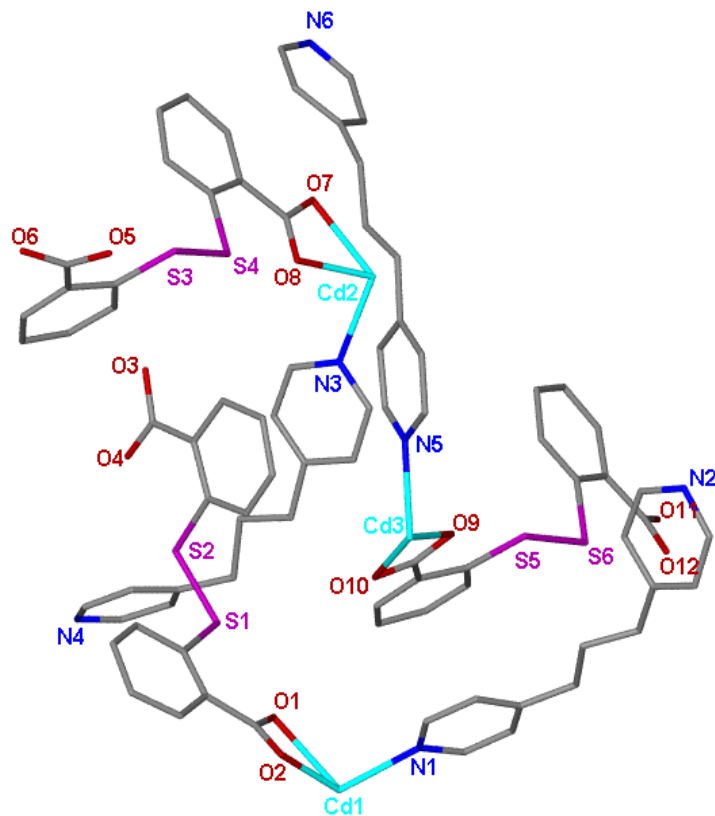

**Fig. S1** The asymmetric unit of the compound 1.

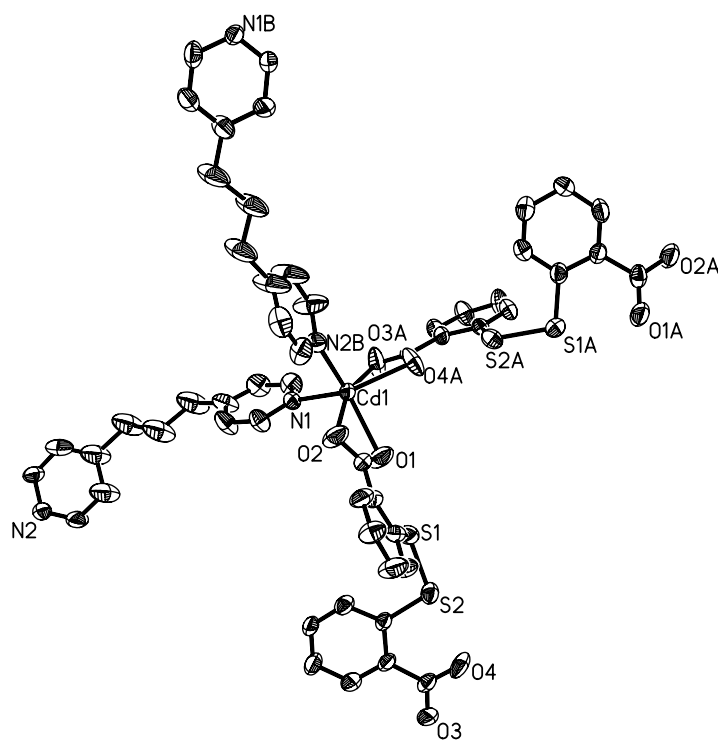

**Fig. S2** The coordination environment of Cd(II) ion in 1 with the thermal ellipsoid at the 30% probability level. Symmetry codes: A: 1-y, 1+x-y, z-1/3, B: 1-x+y, 2-x, z-2/3.

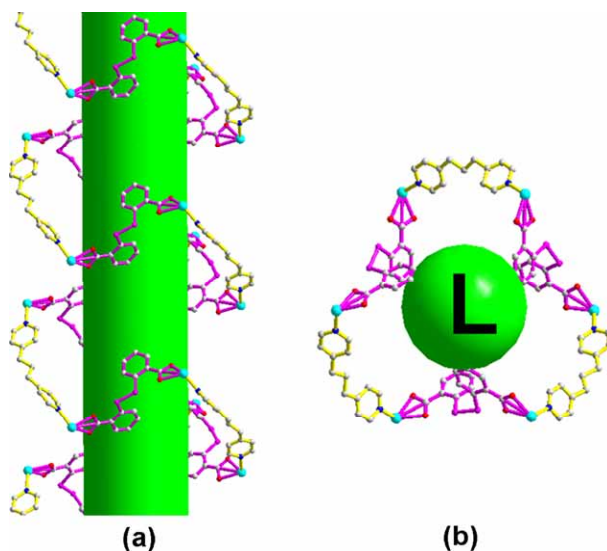

**Fig. S3** The threefold left-handed  $[Cd_2(dtba)(bpp)]_n$  single helix viewed perpendicular to the  $c$  axis (a) and viewed from the  $c$  axis (b). (dtba ligands, bpp ligands and screw axes are shown as pink line, yellow line and green rods, respectively)

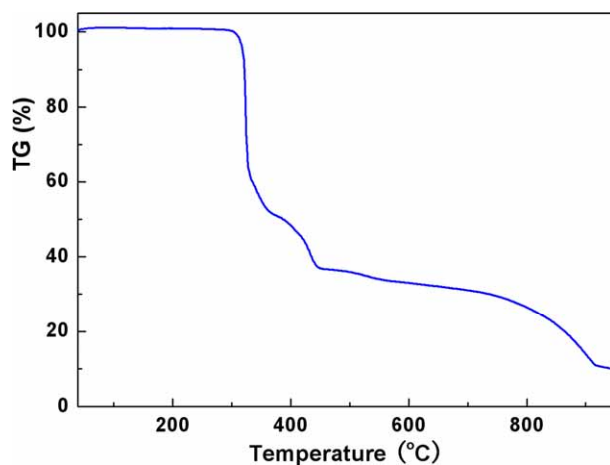

**Fig. S4** TGA curve of compound **1**.

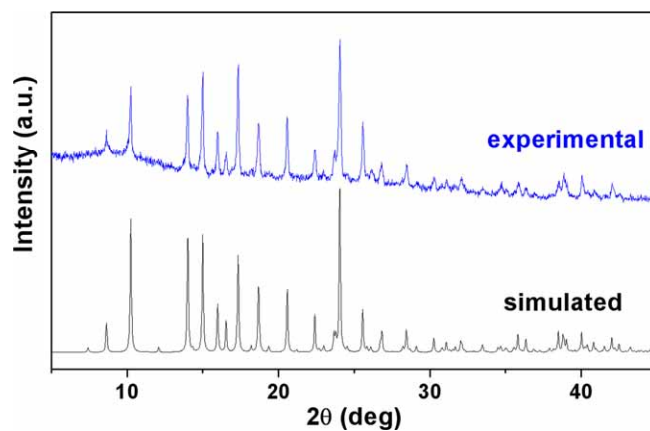

**Fig. S5** Powder XRD patterns of experimental (up) and of simulated from single-crystal data (bottom) for compound **1**.

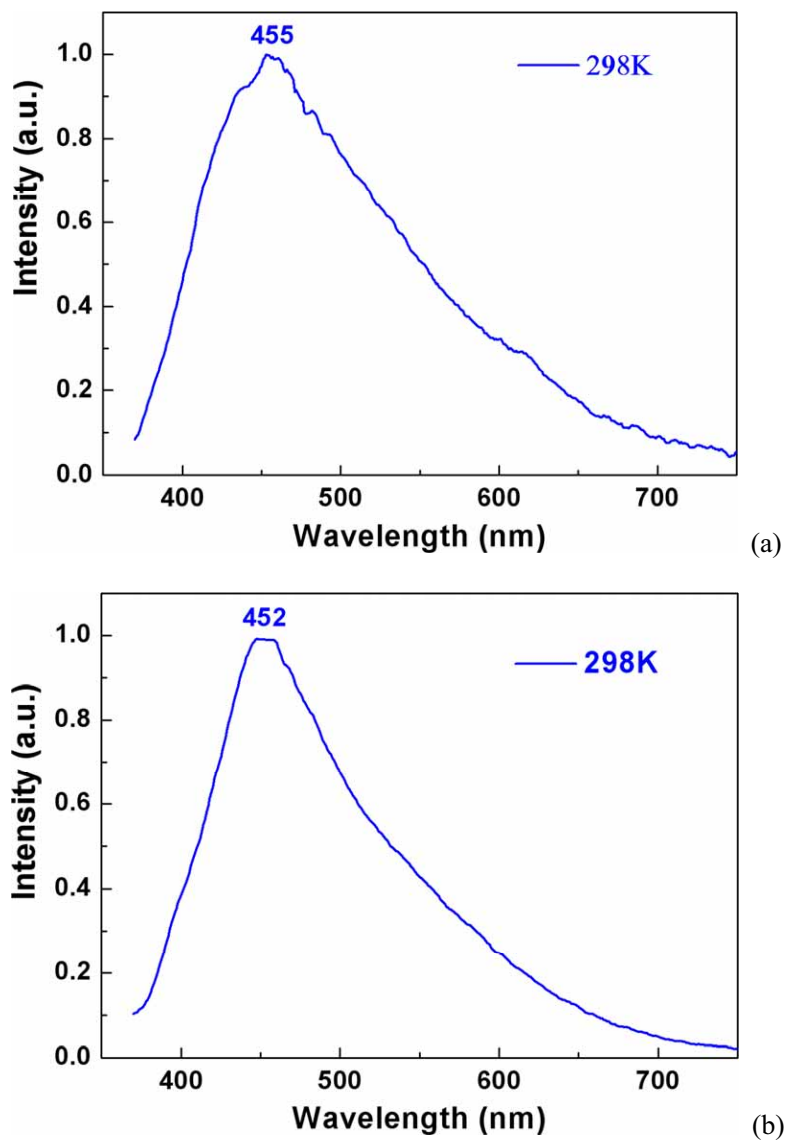

**Fig. S6** (a) Emission spectrum of free H<sub>2</sub>dtba ligand ( $\lambda_{\text{ex}} = 360$  nm). (b) Emission spectrum of free bpp ligand ( $\lambda_{\text{ex}} = 360$  nm).

**Table S1.** Photoluminescent lifetime data for compound **1** at room temperature

| compound | Lifetime (ns)  |                |
|----------|----------------|----------------|
|          | $\tau_1$       | $\tau_2$       |
| <b>1</b> | 1.128 (73.29%) | 4.255 (26.81%) |

**Scheme S1.** Conformational isomers of the H<sub>2</sub>dtba and bpp ligands

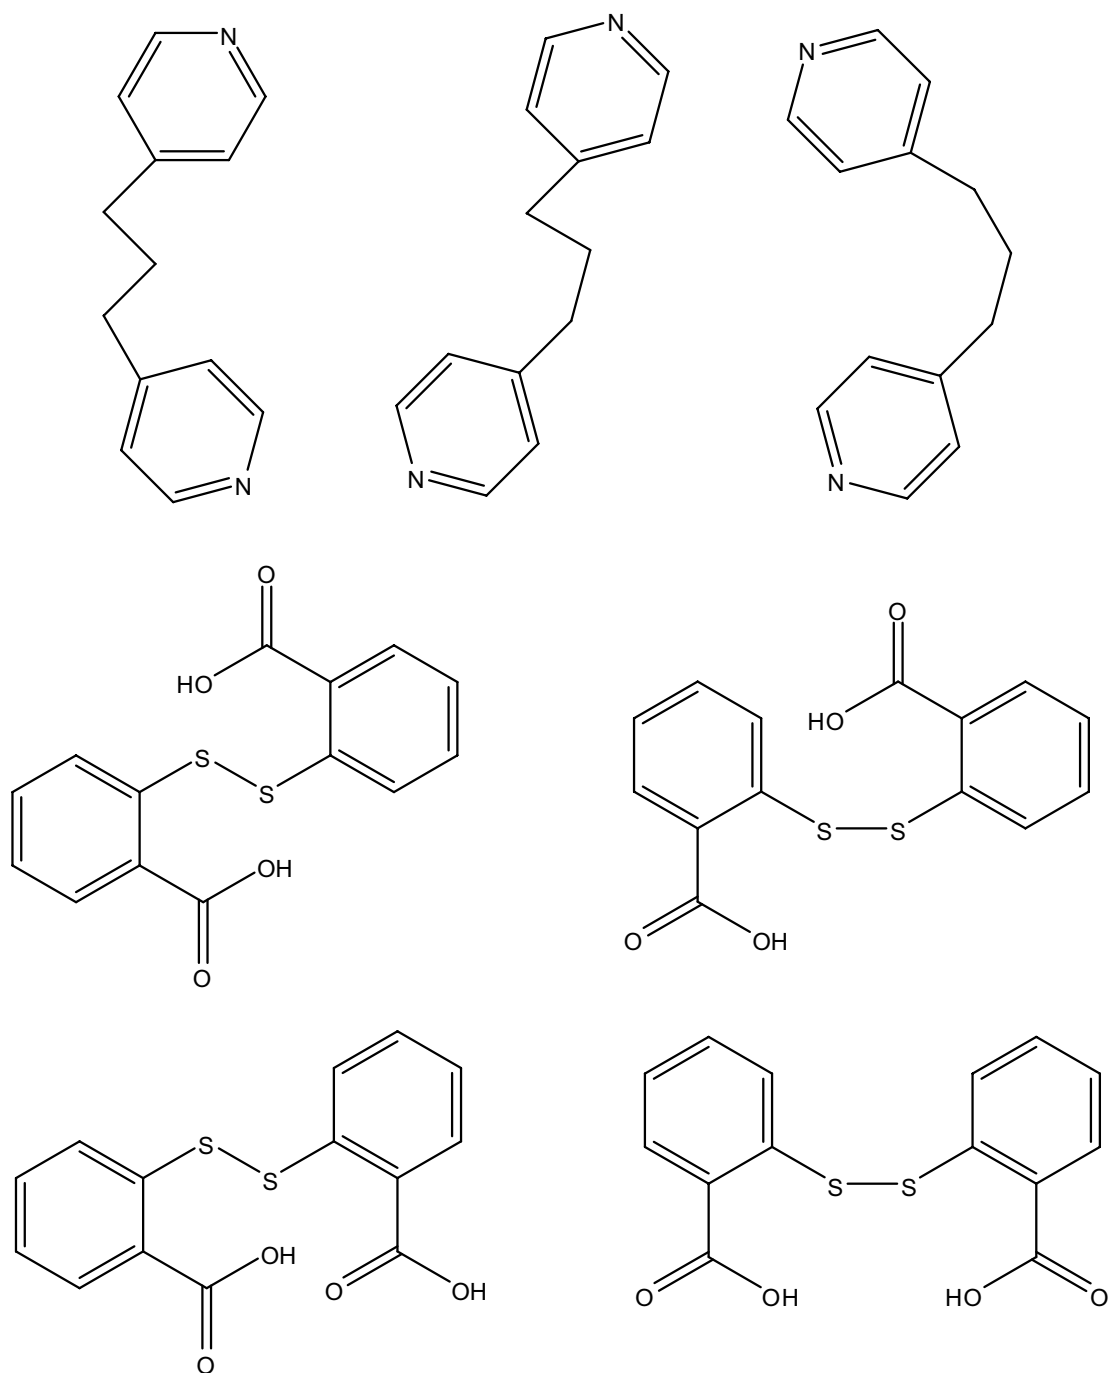

CIF:

Although PLATON ADDSYM Detects Additional (Pseudo) Symm.Elem...S, We can not add symmetry any more by the platon software. It may be due to the disorder of some atoms.
